# Supplementary material
Source: PubMed Central journal article supplement (PMC5038035)
Supplement: AEM.01603-16_zam999117423so1.pdf [file AEM.01603-16_zam999117423so1.pdf]

## SUPPLEMENTARY FIGURES:

Figure S1.

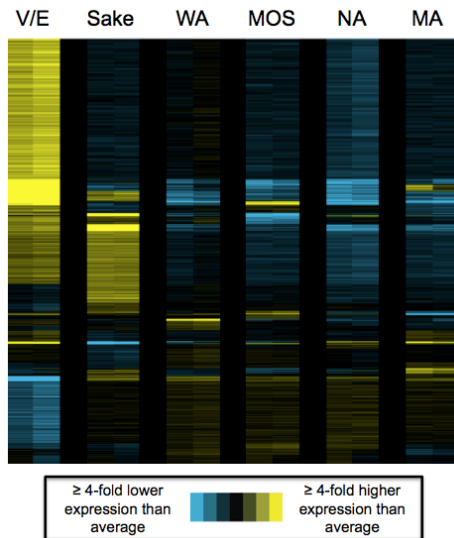

**Supplementary Figure S1. Transcriptional differences in YPD are mainly driven by sensitive strain NCYC361.** Shown is the clustering analysis of log<sub>2</sub> RPKM mean center data for 4,523 genes whose expression was significant different (FDR < 1%) among our six strains; NCYC361 (V/Y), K11 (sake), NCYC3290 (WA), Y7568 (MOS), YPS128 (NA), and UWO.SO5.22-7 (MA). Clustering revealed that most of the differences are driven the sensitive strain NCYC3290 (V/Y).

Figure S2.

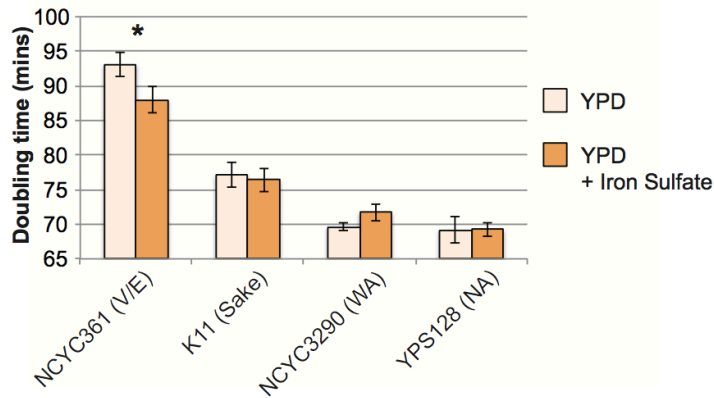

**Supplementary Figure S2. Iron supplementation benefits NCYC361.** Shown are the average and standard deviation of the doubling times measured for each strain in YPD and in YPD supplemented with 100 mg/L of iron sulfate. The doubling time was faster in NCYC361 when medium was supplemented with iron ( $p < 0.0008$ , T-test) but not significantly different for any other strain. Data represent three biological replicates.

Figure S3.

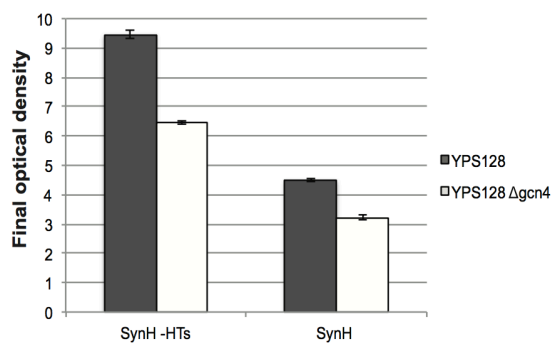

**Figure S3. Deleting *GCN4* reduces growth in both SynH -HTs and SynH.**

Final cell density after 24 hour growth in each medium was measured for HT-resistant strain YPS128 and YPS128 *gcn4D::KanMX*. Shown is the average and standard deviation of two biological replicates in SynH -HTs and SynH.

Figure S4.

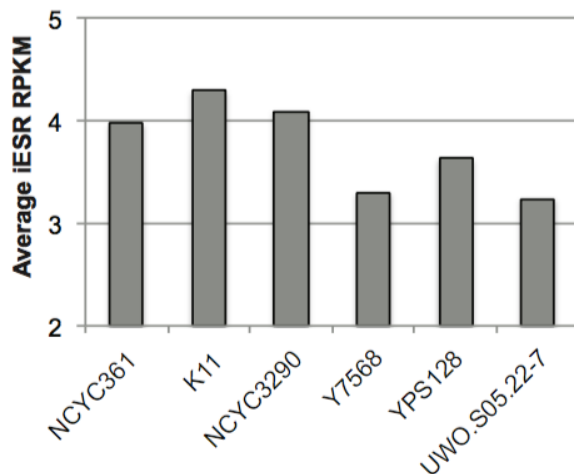

**Figure S4. Sensitive strains showed higher induction of ESR genes.**

The average transcript abundance ( $\log_2(\text{RPKM})$  values) of genes induced in the ESR are shown for listed strains.

Figure S5.

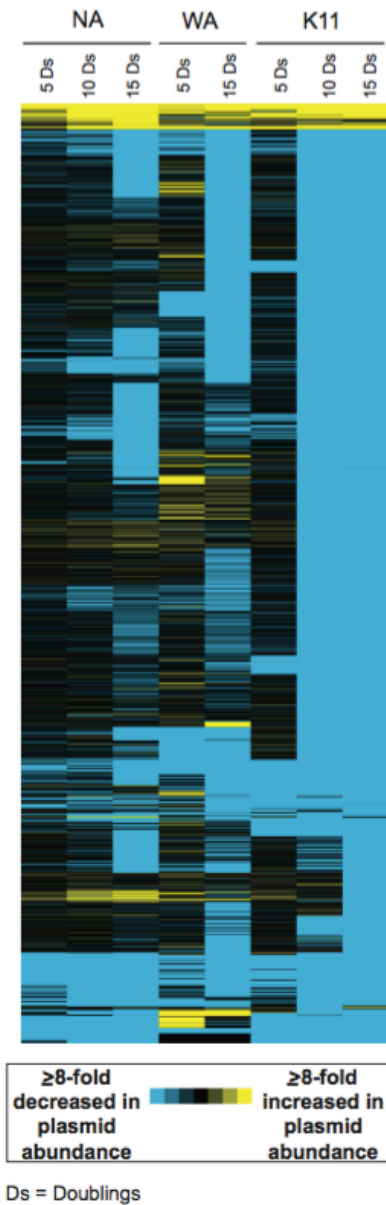

**Figure S5. Strain-specific responses to gene over-expression.** Shown is the combined set of genes that when over expressed in NA (YPS128), WA (NCYC3290), and K11 caused a significant ( $FDR < 0.01$ ) fitness effect. In blue

are gene-plasmids that decreased in abundance compared to the initial unselected pool, while in yellow are gene-plasmids that increased in abundance overtime compared to the initial pool.

## SUPPLEMENTARY TABLES:

**Table S1.** *Saccharomyces cerevisiae* strains

| <b>Strain</b> | <b>Strain source category</b> | <b>Location of isolation</b> | <b>HT relative growth rate</b> |
|---------------|-------------------------------|------------------------------|--------------------------------|
| NCY3455       | Clinical                      | Newcastle, UK                | 5                              |
| K9            | Sake                          | Japan                        | 10                             |
| UC5           | Sake                          | Kurashi, Japan               | 15                             |
| Y2189         | Natural Isolate               | San Jacinto, California, USA | 24                             |
| K10           | Sake                          | Japan                        | 26                             |
| NCYC361       | Other Fermentation            | NA                           | 29                             |
| YJM269        | Other Fermentation            | NA                           | 30                             |
| YB4082        | Natural Isolate               | Philippines                  | 31                             |
| Y1            | Natural Isolate               | NA                           | 32                             |
| YJM320        | Clinical                      | USA                          | 34                             |
| K11           | Sake                          | Japan                        | 34                             |
| K1            | Sake                          | Japan                        | 35                             |
| SK1           | Lab                           | USA                          | 37                             |
| YJM428        | Clinical                      | USA                          | 38                             |
| 322134S       | Clinical                      | Newcastle, UK                | 38                             |
| SB            | Natural Isolate               | Indonesia                    | 40                             |

|           |                                         |                         |    |
|-----------|-----------------------------------------|-------------------------|----|
| YS2       | Bakery                                  | Australia               | 42 |
| NCY3290   | Other Fermentation                      | Indonesia               | 44 |
| L-1528    | Wine fermentation                       | Maule Region, Chile     | 47 |
| DBVPG6765 | Natural Isolate                         | Indonesia               | 48 |
| DCM6      | Natural Isolate                         | Wisconsin, USA          | 49 |
| Y389      | Natural Isolate                         | NA                      | 49 |
| CLIB324   | Bakery                                  | Vietnam                 | 49 |
| 273614N   | Clinical                                | Newcastle, UK           | 50 |
| YPS1009   | Oak                                     | Mettlers Woods, NJ, USA | 50 |
| CLIB382   | Other Fermentation                      | Ireland                 | 51 |
| WE372     | Wine fermentation                       | Cape Town, South Africa | 52 |
| YJM308    | Clinical                                | USA                     | 53 |
| M22       | Vineyard                                | Italy                   | 54 |
| T73       | Wine fermentation                       | Alicante, Spain         | 54 |
| 378604X   | Clinical                                | Newcastle, UK           | 54 |
| DBVPG6044 | Other Fermentation                      | West Africa             | 54 |
| DBVPG1853 | Unknown                                 | Ethiopia                | 57 |
| YJM326    | Clinical                                | USA                     | 58 |
| CBS7960   | Industrial fermentation<br>(sugar cane) | Sau Paulo, Brazil       | 58 |
| YJM978    | Clinical                                | Bergamo, Italy          | 58 |
| YPS606    | Natural Isolate                         | Woodland, PA            | 59 |
| Y6        | Natural Isolate                         | French Guiana           | 59 |
| DBVPG1373 | Natural Isolate                         | The Netherlands         | 59 |
| YJM981    | Clinical                                | Bergamo, Italy          | 60 |
| DBVPG1788 | Natural Isolate                         | Turku, Finland          | 60 |
| YPS163    | Oak                                     | Pennsylvania, USA       | 60 |

|               |                    |                         |    |
|---------------|--------------------|-------------------------|----|
| YB210         | Natural Isolate    | Costa Rica              | 60 |
| YJM454        | Clinical           | USA                     | 60 |
| YPS1000       | Oak                | Mettlers Woods, NJ, USA | 60 |
| YIIC17_E5     | Wine fermentation  | Sauternes, France       | 61 |
| YJM1129       | Other Fermentation | NA                      | 61 |
| DBVPG1106     | Natural Isolate    | Australia               | 61 |
| Y2            | Other Fermentation | Trinidad                | 61 |
| YJM975        | Clinical           | Bergamo, Italy          | 62 |
| UWOPS83-787.3 | Natural Isolate    | Bahamas                 | 62 |
| BC187         | Other Fermentation | Napa Valley, USA        | 63 |
| I14           | Vineyard           | Petina, Italy           | 63 |
| CLIB215       | Bakery             | New Zealand             | 63 |
| YS9           | Bakery             | Singapore               | 63 |
| DCM16         | Natural Isolate    | Wisconsin, USA          | 63 |
| Y3            | Other Fermentation | Africa                  | 64 |
| YS4           | Bakery             | The Netherlands         | 64 |
| YJM339        | Clinical           | USA                     | 64 |
| IL-01         | NA                 | Cahokia, IL             | 64 |
| YJM421        | Clinical           | USA                     | 64 |
| NCYC110       | Other Fermentation | West Africa             | 65 |
| Y55           | Lab                | NA                      | 65 |
| L-1374        | Wine fermentation  | Maule Region, Chile     | 65 |
| YPS128        | Natural Isolate    | Pennsylvania, USA       | 66 |
| YJM440        | Clinical           | USA                     | 66 |
| NC-02         | Other Fermentation | Smoky Mountains, NC     | 67 |
| UWOPS87-2421  | Natural isolate    | Hawaii                  | 68 |
| Y7568         | Natural Isolate    | Philippines             | 68 |

|               |                    |                              |    |
|---------------|--------------------|------------------------------|----|
| FL100         | Lab                | NA                           | 69 |
| PW5           | Other Fermentation | Aba, Nigeria                 | 69 |
| PE-2          | Other Fermentation | Brazil                       | 69 |
| EthanolRed    | Other Fermentation | NA                           | 70 |
| YJM653        | Clinical           | NA                           | 71 |
| Y2209         | Natural Isolate    | San Jacinto, California, USA | 72 |
| YJM451        | Clinical           | Europe                       | 73 |
| UWOPS05-227.2 | Natural Isolate    | Trigona, Malaysia            | 74 |
| UWOPS05-217.3 | Natural Isolate    | Malaysia                     | 75 |
| UWOPS03-461.4 | Natural Isolate    | Malaysia                     | 78 |

Saccharomyces cerevisiae strains used in this study, with their niche, location of isolation, and hydrolysate tolerance (HT) score.



**Table S2.** Toxic cocktail components.

| HT groups       |                 |                        |
|-----------------|-----------------|------------------------|
| AMIDES          | ACIDS           | ALDEHYDES              |
| Feruloyl amide  | p-Coumaric acid | Vanillin               |
| Coumaroyl amide | Ferulic acid    | Syringaldehyde         |
|                 | Benzoic acid    | 4-Hydroxybenzaldehyde  |
|                 | Syringic acid   | 4-Hydroxyacetophenone  |
|                 | Cinnamic acid   | Hydroxymethyl furfural |
|                 | Vanillic acid   |                        |
|                 | Caffeic acid    |                        |

Toxins present in the hydrolysate are divided in three inhibitory groups; amides, acids, and aldehydes.

**Table S3.** Genes responding to HT

| PROCESS                             | GENES             |
|-------------------------------------|-------------------|
| <b>Oxidation-reductase activity</b> |                   |
| Quinone reductase                   | ZTA1, YLR460c     |
| Aldehyde reductase                  | ARI1              |
| Alcohol dehydrogenase               | ADH7, ADH5        |
| Alpha keto amide reductase          | YDL124W           |
| Aryl alcohol dehydrogenase          | AAD4, AAD6, AAD16 |

|                                          |                     |
|------------------------------------------|---------------------|
| Nitric oxide oxidoreductase              | YHB1                |
| Oxidation of thiols                      | FMO1                |
| Nitroreductase                           | FRM2                |
| Fatty-acyl coenzyme A oxidase            | POX1                |
| NADPH oxidoreductase                     | OYE3                |
| NADPH regeneration                       | YMR315W, PYC1, ZWF1 |
| de-novo NAD biosynthesis from tryptophan | BNA1, BNA5          |
| <b>Lyase activity</b>                    |                     |
| Decarboxylase                            | FDC1                |
| <b>Plasma Membrane Transporter</b>       |                     |
| ABC Transporter                          | SNQ2, PDR12         |
| Multidrug transporter                    | FLR1                |

Genes with significantly increased expression when toxins are present were involved in processes that included oxidation-reduction, lyase activity, and plasma membrane transporters.

**Table S4.** Composition of the Synthetic Hydrolysate Media.**SynH base media**

| <b>Chemical Catalog # (Vendor)</b> | <b>Component</b>                                | <b>mM Final Concentration</b> |
|------------------------------------|-------------------------------------------------|-------------------------------|
| P386-500 (Fisher)                  | KH <sub>2</sub> PO <sub>4</sub>                 | 8.76                          |
| P288-500 (Fisher)                  | K <sub>2</sub> HPO <sub>4</sub>                 | 16.725                        |
| 7783-20-2 (MP or Acros)            | (NH <sub>4</sub> ) <sub>2</sub> SO <sub>4</sub> | 45                            |
| P217-500 (Fisher)                  | KCl                                             | 55.2                          |
| S271-500 (Fisher)                  | NaCl                                            | 1.95                          |
| C79-500 (Fisher)                   | CaCl <sub>2</sub> ·2H <sub>2</sub> O            | 8.25                          |
| M33-500 (Fisher)                   | MgCl <sub>2</sub> ·6H <sub>2</sub> O            | 18.75                         |
| 05129-25G (Fluka)                  | L-Alanine                                       | 1.758                         |
| 11039 (Sigma)                      | L-Arginine.HCl                                  | 0.216                         |
| 11149-25G-F (Sigma)                | L-Asparagine                                    | 0.342                         |
| A2025-100G (Sigma)                 | DL-Aspartic acid.K                              | 0.891                         |
| 30129-25G (Sigma)                  | L-Cysteine.HCl                                  | 0.075                         |
| 49419-25G (Sigma)                  | L-glutamine                                     | 0.3885                        |
| G1501-500G (Sigma)                 | L-Glutamic acid.K                               | 0.9105                        |
| 410225-250G (Sigma)                | Glycine                                         | 0.567                         |
| 71-00-1 (Acros)                    | L-Histidine                                     | 0.0561                        |
| 58879 (Sigma)                      | L-Isoleucine                                    | 0.393                         |
| 61819-25G (Sigma)                  | L-Leucine                                       | 0.5565                        |

|                                         |                                                                                    |        |
|-----------------------------------------|------------------------------------------------------------------------------------|--------|
| L5626-100G (Sigma)                      | L-Lysine.HCl                                                                       | 0.2625 |
| 64319-25G-F (Sigma)                     | L-Methionine                                                                       | 0.15   |
| P5482-25G (Sigma)                       | L-Phenylalanine                                                                    | 0.423  |
| 81709-25G (Sigma)                       | L-Proline                                                                          | 0.984  |
| 84959-100G (Sigma)                      | L-Serine                                                                           | 0.5535 |
| 89179-10G (Sigma) or 72-19-5<br>(Acros) | L-Threonine                                                                        | 0.465  |
| 93659-10G (Sigma)                       | L-Tryptophan                                                                       | 0.075  |
| 72-18-4 (Acros)                         | L-Valine                                                                           | 0.636  |
| 93829-25G (Sigma)                       | L-Tyrosine                                                                         | 0.303  |
| 1152 (Calbiochem)                       | Adenine                                                                            | 0.075  |
| 71-30-7 (Alfa Aesar)                    | Cytosine                                                                           | 0.075  |
| 6630 (Calbiochem)                       | Uracil                                                                             | 0.075  |
| 73-40-5 (Alfa Aesar)                    | Guanine                                                                            | 0.075  |
| MP103028 or Sigma BP892-100             | Thiamine HCl                                                                       | 0.0006 |
| Sigma C8731-25G                         | Calcium Pantothenate                                                               | 0.0045 |
| 96469 (Fluka)                           | ZnCl <sub>2</sub>                                                                  | 30     |
| M87-500 (Fisher)                        | MnCl <sub>2</sub> ·4H <sub>2</sub> O                                               | 136.5  |
| 307483-100G (Sigma)                     | CuCl <sub>2</sub> ·2H <sub>2</sub> O                                               | 2.85   |
| 60820 (Fluka)                           | CoCl <sub>2</sub> ·6H <sub>2</sub> O                                               | 0.045  |
| B6768-500G (Sigma)                      | H <sub>3</sub> BO <sub>4</sub>                                                     | 34.65  |
| 09878 (Fluka)                           | (NH <sub>4</sub> ) <sub>6</sub> Mo <sub>7</sub> O <sub>24</sub> ·4H <sub>2</sub> O | 0.465  |
| 10025-77-1 (Acros)                      | FeCl <sub>3</sub> ·6H <sub>2</sub> O                                               | 30     |

|                                |                              |                |
|--------------------------------|------------------------------|----------------|
| S648-500 (Fisher)              | Sodium formate               | 4.2            |
| S343-500 (Fisher)              | Sodium nitrate               | 1.65           |
| S413-500 (Fisher)              | Sodium succinate             | 0.75           |
| G33-500 (Fisher), D=1.261 g/ml | Glycerol                     | 6.15           |
| 14300 (Fluka)                  | Betaine.H2O                  | 1.05           |
| 67-48-1 (Acros)                | Choline Chloride             | 0.45           |
| 461-05-2 (Acros)               | DL-Carnitine                 | 0.45           |
| 00160 (Fluka)                  | Acetamide                    | 120            |
| BP333-500 (Fisher)             | Sodium acetate               | 48             |
|                                | L-lactatic acid (90%)        | 6              |
| 3458-28-4 (Acros)              | D-Mannose                    | 1.8            |
| 87-72-9 (Acros)                | L-Arabinose                  | 30             |
| L96-500 (Fisher)               | D-Fructose                   | 36             |
| G0750-500G (Sigma)             | D-Galactose                  | 4.35           |
| D16-1 (Fisher)                 | D-Glucose                    | 90g/l (500mM)  |
| 141000025 (Acros)              | D(+)Xylose                   | 45g/l (300 mM) |
| BP267750 (Fisher)              | Pyridoxine.HCl               | 3.21 µM        |
| 1282950000 (Acros)             | Nicotinic Acid               | 40.17 µM       |
| B4501-10G (Sigma)              | Biotin                       | 0.15 µM        |
| 57570-25G (Fluka) myo-Inositol | Inositol                     | 0.084 mM       |
| 59924-1KG-F (Fluka)            | Polysorbate 80 (Tween<br>80) | 1.5 ml/l       |
| E6510-10G (Sigma)              | Ergosterol                   | 15 mg/l        |

## HT cocktail

| Chemical Catalog # (Vendor) | Toxin                        | mM    |
|-----------------------------|------------------------------|-------|
| Home made                   | Feruloyl amide               | 8.25  |
| Home made                   | Coumaroyl amide              | 8.25  |
| H40807-5G (Aldrich)         | 5-Hydroxymethyl-2-furadehyde | 1.65  |
| C9008-25G (Sigma)           | <i>p</i> -Coumaric acid      | 3.15  |
| W518301-100G (Sigma)        | Ferulic acid                 | 1.065 |
| 242381-100G (Sigma)         | Benzoic acid                 | 0.73  |
| S6881-25G (Sigma)           | Syringic acid                | 0.11  |
| C80857-250G (Aldrich)       | Cinnamic acid                | 0.14  |
| H36001-25G (Aldrich)        | Vanillic acid                | 0.13  |
| C0625-5G (Sigma)            | Caffeic acid                 | 0.02  |
| V1104-100G (Sigma)          | Vanillin                     | 0.20  |
| S7602-25G (Aldrich)         | Syringaldehyde               | 0.24  |
| 144088-50G (Aldrich)        | 4-Hydroxybenzaldehyde        | 0.30  |
| 278564-100G (Aldrich)       | 4-Hydroxyacetophenone        | 0.04  |
